# Supplementary material for: How different terminology for ductal carcinoma in situ impacts women's concern and treatment preferences: a randomised comparison within a national community survey
Source: HighWire-hosted journal article supplement (doi:10.1136/bmjopen-2015-008094), 2015-11-01
Supplement: bmjopen-2015-008094supp1.pdf [file bmjopen-2015-008094supp1.pdf]

**Appendix 1.** Example scenario of a ductal carcinoma in-situ diagnosis and questions for women in Arm A and Arm B

Arm A:

*Breast screening (mammograms) detects abnormal changes of cells in the breast as well as finding breast cancers. In some women these abnormal cells can progress to invasive cancer and in others they do not. It's estimated that if left untreated about one-third may progress to breast cancer over 10 years or more. That means that for about two-thirds of women these abnormal cells may not become cancer.*

*Imagine you had an abnormal breast screen and follow-up tests showed that there were abnormal cells found in your breast.*

1. How concerned would you be about your result?

- Extremely concerned
- Moderately concerned
- Neither concerned nor unconcerned
- Not really concerned
- Not concerned at all

*Abnormal breast cells are usually treated by surgery, radiation or drugs as in the case of breast cancer. Another approach is called watchful waiting, where doctors closely monitor the abnormal breast cells with regular mammograms and only treat if cells become more abnormal.*

2. If research shows that watchful waiting is a safe and effective option, how do you think you would prefer to manage these abnormal cells? Would you say...

- Definitely prefer treatment
- Probably prefer treatment
- Prefer to do nothing
- Probably prefer watchful waiting (close monitoring by doctors)
- Definitely prefer watchful waiting (close monitoring by doctors)

3. Thinking again about the previous scenario, if these abnormal cells in your breast were instead called pre-invasive breast cancer cells, would you be more concerned or less concerned about your screening test result?

- More concerned
- No difference
- Less concerned

4. And if research shows that watchful waiting is a safe and effective option, how do you think you would prefer to manage these pre-invasive breast cancer cells? Would you say...

- Definitely prefer treatment
- Probably prefer treatment
- Prefer to do nothing
- Probably prefer watchful waiting (close monitoring by doctors)
- Definitely prefer watchful waiting (close monitoring by doctors)

Arm B:

*Breast screening (mammograms) detects pre-invasive breast cancer cells in the breast as well as finding breast cancers. In some women these pre-invasive breast cancer cells can progress to invasive cancer and in others they do not. It's estimated that if left untreated about one-third may progress to breast cancer over 10 years or more. That means that for about two-thirds of women these pre-invasive breast cancer cells may not become cancer.*

*Imagine you had a breast screen and follow-up tests showed that there were pre-invasive breast cancer cells found in your breast.*

1. How concerned would you be about your result? Would you say...

- Extremely concerned
- Moderately concerned
- Neither concerned nor unconcerned
- Not really concerned
- Not concerned at all

*Pre-invasive breast cancer cells are usually treated by surgery, radiation or drugs as in the case of breast cancer. Another approach is called watchful waiting, where doctors closely monitor the pre-invasive breast cancer cells with regular mammograms and only treat if cells become more invasive.*

2. If research shows that watchful waiting is a safe and effective option, how do you think you would prefer to manage these pre-invasive breast cancer cells? Would you say...

- Definitely prefer treatment
- Probably prefer treatment
- Prefer to do nothing
- Probably prefer watchful waiting (close monitoring by doctors)
- Definitely prefer watchful waiting (close monitoring by doctors)

3. Thinking again about the previous scenario, if these pre-invasive breast cancer cells were instead called abnormal cells, would you be more concerned or less concerned about your screening test result?

- More concerned
- No difference
- Less concerned

4. And if research shows that watchful waiting is a safe and effective option, how do you think you would prefer to manage these abnormal cells? Would you say...

- Definitely prefer treatment
- Probably prefer treatment
- Prefer to do nothing
- Probably prefer watchful waiting (close monitoring by doctors)
- Definitely prefer watchful waiting (close monitoring by doctors)
