# Supplementary material for: How different terminology for ductal carcinoma in situ impacts women's concern and treatment preferences: a randomised comparison within a national community survey
Source: HighWire-hosted journal article supplement (doi:10.1136/bmjopen-2015-008094), 2015-11-01
Supplement: bmjopen-2015-008094supp3.pdf [file bmjopen-2015-008094supp3.pdf]

**Appendix 3.** Change in treatment preferences (n=269)

| <b>Arm A: 'Abnormal cells first'</b>         |                      | <i>With PI breast cancer:</i> |                      |                         |
|----------------------------------------------|----------------------|-------------------------------|----------------------|-------------------------|
|                                              |                      | Prefer Treatment              | Prefer watchful wait |                         |
| <i>With Abnormal:</i>                        | Prefer Treatment     | 27%                           | 6%                   | <i>P-value=0.008</i>    |
|                                              | Prefer watchful wait | 18%                           | 49%                  |                         |
| <b>Arm B: 'PI breast cancer cells first'</b> |                      | <i>With Abnormal:</i>         |                      |                         |
|                                              |                      | Prefer Treatment              | Prefer watchful wait |                         |
| <i>With PI breast cancer:</i>                | Prefer Treatment     | 32%                           | 8%                   | <i>P-value&gt;0.999</i> |
|                                              | Prefer watchful wait | 9%                            | 51%                  |                         |
